# Supplementary material for: Triple-walled SnO2@N-doped carbon@SnO2 nanotubes as an advanced anode material for lithium and sodium storage
Source: Royal Society of Chemistry journal article supplement (doi:10.1039/c5ta06080j), 2015-01-01
Supplement: c5ta06080j1.pdf [file c5ta06080j1.pdf]

*Supporting Information*

# Triple-walled $\text{SnO}_2@\text{N-doped Carbon}@\text{SnO}_2$ Nanotubes as an Advanced Anode Material for Lithium and Sodium Storage

Jie Yue,<sup>a</sup> Wenpeng Wang,<sup>a</sup> Nana Wang,<sup>a</sup> Xianfeng Yang,<sup>b</sup> Jinkui Feng,<sup>c</sup> Jian Yang<sup>\*a</sup>  
and Yitai Qian<sup>a,d</sup>

<sup>a</sup> Key Laboratory of Colloid and Interface Chemistry, Ministry of Education, School of Chemistry and Chemical Engineering, Shandong University, Jinan 250100, P.R. China

<sup>b</sup> Analytical and Testing Center, South China University of Technology, Guangzhou, 510640, China

<sup>c</sup> Key Laboratory for Liquid-Solid Structural Evolution & Processing of Materials, Ministry of Education, School of Materials Science and Engineering, Shandong University, Jinan 250061, P.R. China

<sup>d</sup> Hefei National Laboratory for Physical Science at Microscale, Department of Chemistry, University of Science and Technology of China, Hefei, 230026, P.R. China

\* To whom the correspondence should be addressed. Email: yangjian@sdu.edu.cn

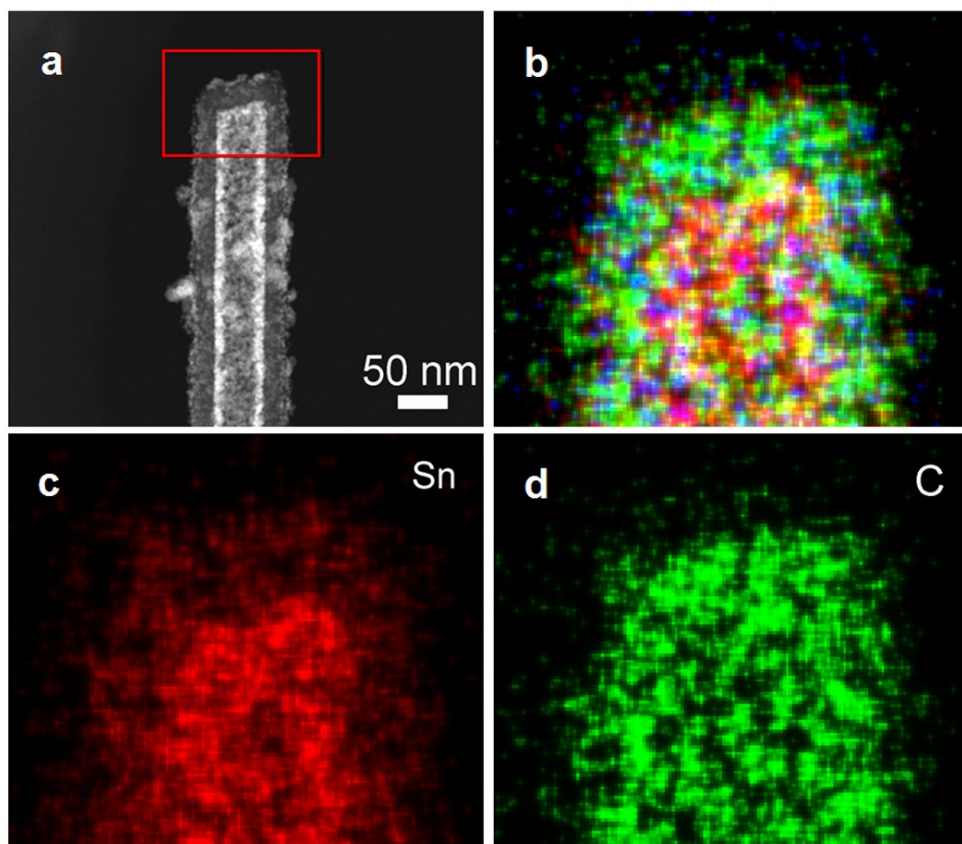

**Fig. S1** (a) TEM image and (b-d) elemental mapping of SnO<sub>2</sub>@N-doped Carbon@SnO<sub>2</sub> (SCS) nanotubes.

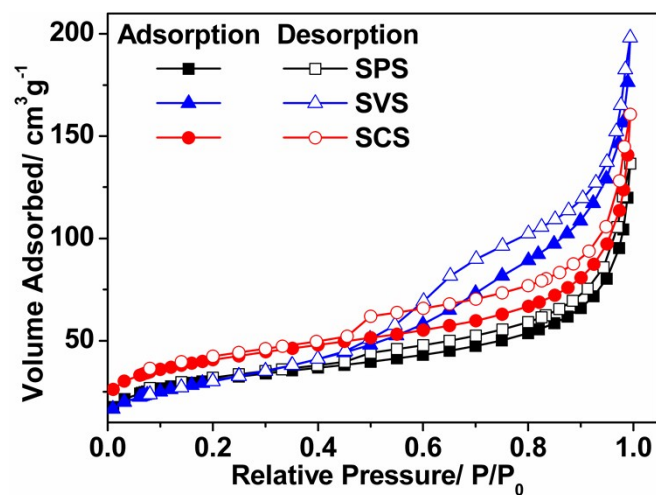

**Fig. S2** Nitrogen adsorption-desorption isotherms of SnO<sub>2</sub>@PPy@SnO<sub>2</sub> (SPS), SnO<sub>2</sub>@N-doped Carbon@SnO<sub>2</sub> (SCS) and SnO<sub>2</sub>@Void@SnO<sub>2</sub> (SVS) nanotubes.

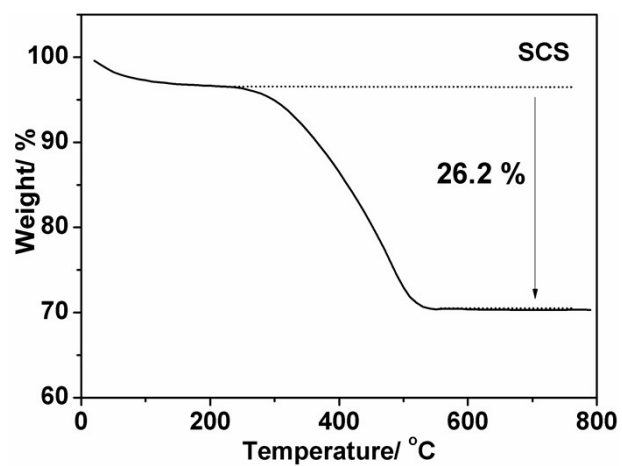

**Fig. S3** TG curve of SnO<sub>2</sub>@N-doped Carbon@SnO<sub>2</sub> (SCS) nanotubes at a heating rate of 10 °C min<sup>-1</sup> in air.

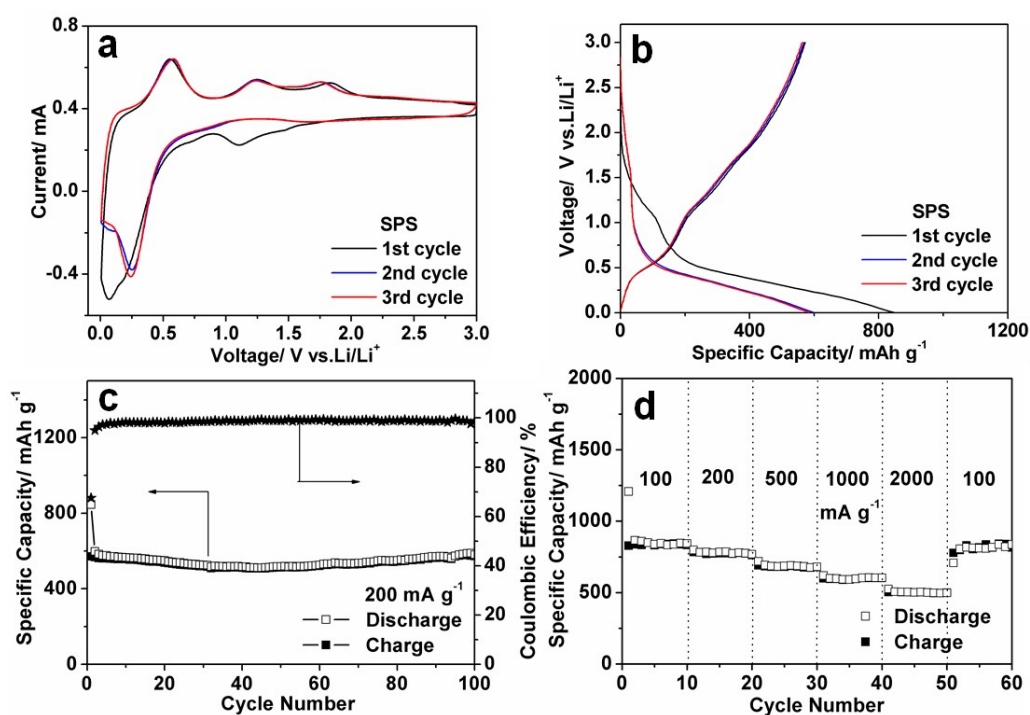

**Fig. S4** Electrochemical performance of SnO<sub>2</sub>@PPy@SnO<sub>2</sub> (SPS) nanotubes versus Li, tested between 0.005 and 3V. (a) cyclic voltammograms (CVs) of SPS nanotubes at a scanning rate of 0.1 mV s<sup>-1</sup>. (b) first three discharge-charge curves and (c) cycling performances of SPS at a current density of 200 mA g<sup>-1</sup>. (d) rate performances of SPS nanotubes.

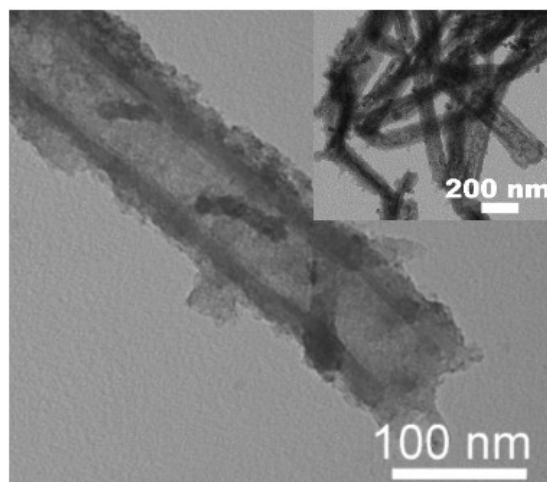

**Fig. S5** TEM images of the electrodes made of  $\text{SnO}_2@\text{N-doped Carbon}@\text{SnO}_2$  (SCS) nanotubes after rate capability test versus Li for 60 cycles.

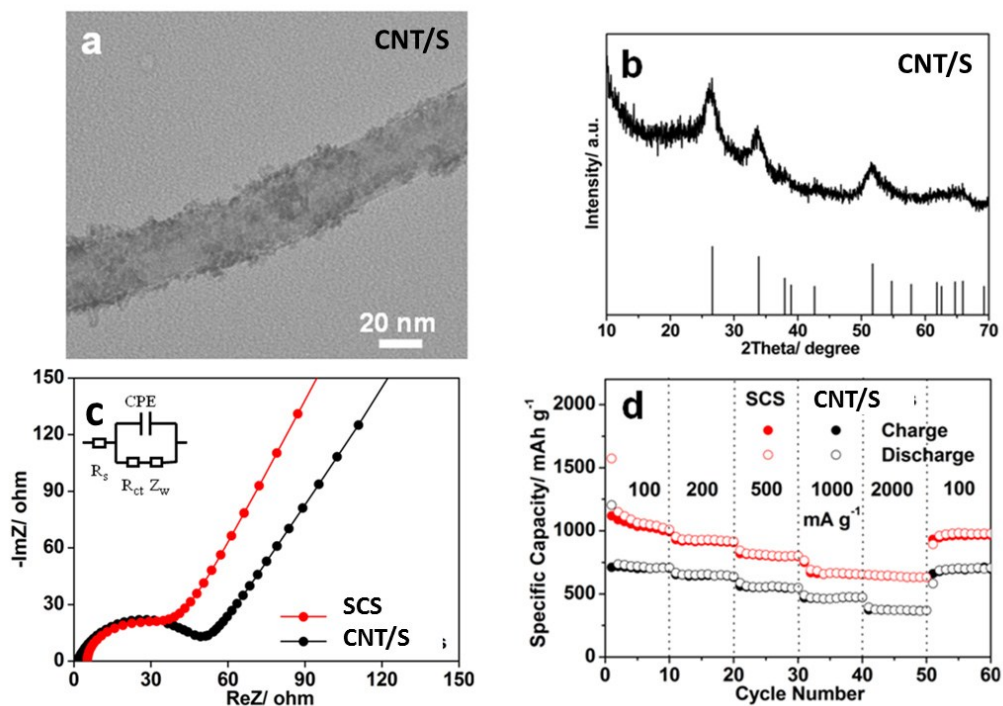

**Fig. S6** (a) TEM image and (b) XRD pattern of CNT-supported SnO<sub>2</sub> nanoparticles (CNT/S). (c) EIS spectra and (d) rate performances of SCS and CNT/S.

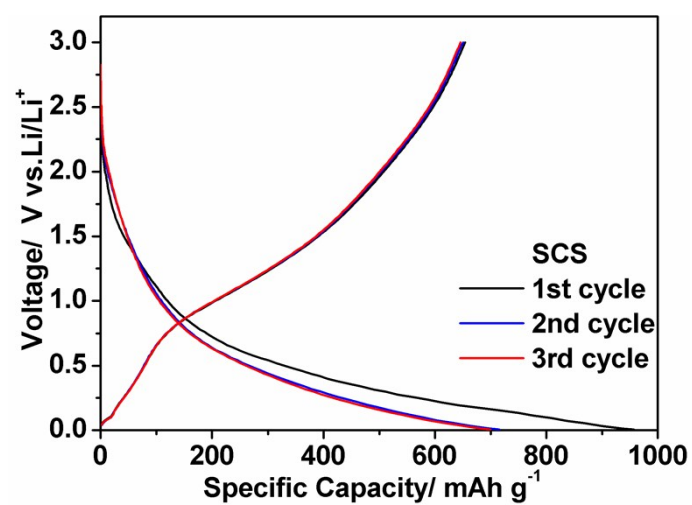

**Fig. S7** First three discharge-charge curves SnO<sub>2</sub>@N-doped Carbon@SnO<sub>2</sub> (SCS) at a current density of 25 mA g<sup>-1</sup> in NIBs.
